# Supplementary material for: Early life cognitive development trajectories and intelligence quotient in middle childhood and early adolescence in rural western China
Source: PubMed Central journal article supplement (PMC6892923; doi:10.1038/s41598-019-54755-1), 2019-12-04
Supplement: 41598_2019_54755_MOESM1_ESM.pdf [file 41598_2019_54755_MOESM1_ESM.pdf]

## Supplementary Online Content

Early life cognitive development trajectories and intelligence quotient in middle childhood and early adolescence in rural western China

Zhonghai Zhu, Suying Chang, Yue Cheng, Qi Qi, Shaoru Li, Mohamed Elhoumed, Hong Yan, Michael J Dibley, Wafaie W. Fawzi, Lingxia Zeng, Christopher R. Sudfeld

**Supplementary Table S1.** Comparisons of background characteristics between individuals lost to follow-up and those followed at middle childhood and adolescence

**Supplementary Table S2** Fit indices for identified trajectories for cognitive development during the first two years of life

**Supplementary Table S3.** Characteristics of cognitive development trajectories during the first two years of life in a Chinese birth cohort study

**Supplementary Table S4.** Predictors of cognitive developmental trajectories identified in early childhood from a Chinese birth cohort study

**Supplementary Table S5.** Associations of identified cognitive development trajectories in the first two years of life with cognitive outcomes in middle childhood and early adolescence: using inverse probability weighting to account for missing outcome data

**Supplementary Table S6.** Associations of identified cognitive development trajectories in the first two years of life with WISC-IV components (VCI, WMI, PRI, PSI) at middle childhood

**Supplementary Table S7.** Associations of identified cognitive development trajectories in the first two years of life with WISC-IV components (VCI, WMI, PRI, PSI) at early adolescence

**Supplementary Table S8.** Tertiles of mental development score at the 12 and 24 months and cognitive outcomes at middle childhood and early adolescence

**Supplementary Fig. S1.** Flow chart of study participants

**Supplementary Table S1 Comparisons of background characteristics between individuals lost to follow-up and those followed at middle childhood and adolescence**

| Factors              | Middle childhood/ No. (%) / Mean (SD) |                   |          | Adolescence/ No. (%) / Mean (SD) |                   |          |
|----------------------|---------------------------------------|-------------------|----------|----------------------------------|-------------------|----------|
|                      | Completed assessments                 | Loss to follow-up | P values | Completed assessments            | Loss to follow-up | P values |
| N                    | 669(48.2)                             | 719(51.8)         |          | 735(53.0)                        | 653(47.1)         |          |
| Maternal age         | 24.7(4.5)                             | 24.1(4.4)         | 0.02     | 24.4(4.5)                        | 24.3(4.4)         | 0.52     |
| Maternal education   |                                       |                   | 0.08     |                                  |                   | 0.02     |
| < 3 years            | 35(5.2)                               | 26(3.6)           |          | 30(4.1)                          | 31(4.8)           |          |
| Primary              | 174(26.1)                             | 167(23.3)         |          | 189(25.8)                        | 152(23.3)         |          |
| Secondary            | 383(57.3)                             | 415(57.9)         |          | 399(54.4)                        | 399(61.2)         |          |
| High school+         | 76(11.4)                              | 109(15.2)         |          | 115(15.7)                        | 70(10.7)          |          |
| Maternal occupation  |                                       |                   | 0.07     |                                  |                   | 0.32     |
| Farmer               | 576(86.6)                             | 596(83.1)         |          | 615(83.9)                        | 557(85.8)         |          |
| Others               | 89(13.4)                              | 121(16.9)         |          | 118(16.1)                        | 92(14.2)          |          |
| Paternal age (years) | 28.0(4.4)                             | 27.4(4.1)         | 0.01     | 27.7(4.2)                        | 27.7(4.3)         | 0.91     |
| Paternal education   |                                       |                   | 0.70     |                                  |                   | 0.09     |
| < 3 years            | 7(1.1)                                | 5(0.7)            |          | 9(1.2)                           | 3(0.5)            |          |
| Primary              | 68(10.2)                              | 68(10.2)          |          | 80(10.9)                         | 59(9.1)           |          |
| Secondary            | 446(67.0)                             | 446(67.0)         |          | 465(63.5)                        | 449(69.1)         |          |
| High school+         | 145(21.8)                             | 145(21.8)         |          | 178(24.3)                        | 139(21.4)         |          |
| Paternal occupation  |                                       |                   | <0.001   |                                  |                   | 0.29     |
| Farmer               | 536(80.2)                             | 518(72.1)         |          | 549(74.9)                        | 505(77.3)         |          |
| Others               | 132(19.8)                             | 200(27.9)         |          | 184(25.1)                        | 148(22.7)         |          |

| Factors                                                  | Middle childhood/ No. (%) / Mean (SD) |                   |          | Adolescence/ No. (%) / Mean (SD) |                   |          |
|----------------------------------------------------------|---------------------------------------|-------------------|----------|----------------------------------|-------------------|----------|
|                                                          | Completed assessments                 | Loss to follow-up | P values | Completed assessments            | Loss to follow-up | P values |
| Household wealth at enrollment                           |                                       |                   | 0.20     |                                  |                   | 0.61     |
| Low                                                      | 170(25.4)                             | 154(21.4)         |          | 179(24.4)                        | 145(22.2)         |          |
| Medium                                                   | 266(39.8)                             | 296(41.2)         |          | 291(39.6)                        | 271(41.5)         |          |
| High                                                     | 233(34.8)                             | 269(37.4)         |          | 265(36.1)                        | 237(36.3)         |          |
| Parity at enrollment                                     |                                       |                   | 0.07     |                                  |                   | 0.94     |
| 0                                                        | 439(65.6)                             | 504(70.1)         |          | 500(68.0)                        | 443(67.8)         |          |
| ≥1                                                       | 230(34.4)                             | 215(29.9)         |          | 235(62.0)                        | 210(32.2)         |          |
| Maternal MUAC (cm)                                       |                                       |                   | 0.56     |                                  |                   | 0.08     |
| <21.5                                                    | 110(16.5)                             | 109(15.3)         |          | 104(14.3)                        | 115(17.7)         |          |
| ≥21.5                                                    | 557(83.5)                             | 602(84.7)         |          | 624(85.7)                        | 535(82.3)         |          |
| Trial regimen                                            |                                       |                   | 0.18     |                                  |                   | 0.32     |
| Folic acid                                               | 246(36.8)                             | 250(34.8)         |          | 265(36.1)                        | 231(35.4)         |          |
| Iron/folic acid                                          | 209(31.2)                             | 258(35.9)         |          | 235(32.0)                        | 232(35.5)         |          |
| Multiple micronutrients                                  | 214(32.0)                             | 211(29.4)         |          | 235(32.0)                        | 190(29.1)         |          |
| Child characteristics                                    |                                       |                   |          |                                  |                   |          |
| Male                                                     | 404(60.4)                             | 441(61.3)         | 0.72     | 448(61.0)                        | 397(60.8)         | 0.95     |
| Birth weight (g)                                         | 3170(420)                             | 3201(399)         | 0.16     | 3197(401)                        | 3173(419)         | 0.28     |
| Gestation weeks at birth                                 | 39.9(1.6)                             | 39.9(1.5)         | 0.85     | 39.9(1.5)                        | 39.9(1.6)         | 0.97     |
| Preterm (<37 weeks gestation)                            | 27(4.0)                               | 23(3.2)           | 0.40     | 19(2.6)                          | 31(4.8)           | 0.03     |
| Low birth weight (<2500g)                                | 36(5.5)                               | 14(2.0)           | 0.001    | 25(3.4)                          | 25(3.9)           | 0.65     |
| Small for gestational age (<10 <sup>th</sup> percentile) | 87(13.4)                              | 78(11.3)          | 0.24     | 82(11.5)                         | 83(13.3)          | 0.33     |

**Supplementary Table S2 Fit indices for identified trajectories for cognitive development during the first two years of life**

| Number of groups | Trajectory shapes <sup>a</sup> | P values for the test of parameters | BIC <sup>b</sup> | AIC <sup>b</sup> | APP <sup>c</sup>         | OCC <sup>d</sup> | Size (%)                     |
|------------------|--------------------------------|-------------------------------------|------------------|------------------|--------------------------|------------------|------------------------------|
| 2                | 1 1                            | 0.22/0.54                           | -6621.68         | -6606.21         | 0.82/0.90                | 85/41            | 25.52/74.48                  |
| 3                | 1 1 1                          | 0.01/0.63/0.90                      | -6574.95         | -6551.75         | 0.84/0.82/0.80           | 941/25/48        | 2.94/58.54/38.52             |
| 4                | 1 1 1 1                        | 0.001/<0.001/0.004/0.13             | -6569.13         | -6538.18         | 0.81/0.66/0.67/0.76      | 668/94/27/20     | 3.14/12.28/33.57/51.00       |
| 5                | 1 1 1 1 1                      | 0.001/0.01/0.002/0.04/0.007         | -6565.80         | -6527.12         | 0.79/0.68/0.68/0.64/0.65 | 559/124/29/12/12 | 3.26/10.54/31.15/42.20/12.84 |
| 4                | 2 2 2 2                        | 0.15/0.03/0.79/0.02                 | -6575.98         | -6534.73         | 0.83/0.67/0.67/0.77      | 882/103/27/20    | 2.99/11.89/33.59/51.53       |
| 4                | 3 3 3 3                        | 0.41/0.001/0.001/0.68               | -6579.16         | -6527.59         | 0.83/0.71/0.70/0.77      | 918/132/29/21    | 2.93/10.79/35.86/50.42       |
| 4                | 1 3 3 1                        | <0.001/<0.001/0.001/0.05            | -6568.19         | -6526.94         | 0.81/0.72/0.71/0.75      | 738/152/25/21    | 3.18/10.24/40.26/46.32       |
| 4                | 1 3 3 2                        | 0.001/0.41/0.96/0.93                | -6572.72         | -6528.88         | 0.84/0.72/0.79/0.76      | 1087/189/53/17   | 2.69/10.70/31.42/35.18       |

<sup>a</sup>Trajectory shapes: 1=linear, 2=quadratic, 3=cubic.

<sup>b</sup>BIC, Bayesian information criterion. AIC, Akaike information criterion. The model with the highest (least negative) value of BIC and AIC is preferred.

<sup>c</sup>APP, an average of the posterior probabilities of group membership for individuals assigned to each group, should exceed 0.7, range 0.00-1.00.

<sup>d</sup>OCC, odds of correct classification based on the posterior probabilities of group membership, should exceed 5.

**Supplementary Table S3 Characteristics of cognitive development trajectories during the first two years of life in a Chinese birth cohort study**

| Items                                                    | Mean (SD)/ n (%)                                     |                                                      |                                          |                                                | P values for differences among groups |
|----------------------------------------------------------|------------------------------------------------------|------------------------------------------------------|------------------------------------------|------------------------------------------------|---------------------------------------|
|                                                          | Subgroup 1: Start below average-then decrease (N=35) | Subgroup 2: Start below average-then increase (N=99) | Subgroup 3: Consistently average (N=530) | Subgroup 4: Consistently above average (N=724) |                                       |
| Socioeconomic characteristics at enrollment <sup>a</sup> |                                                      |                                                      |                                          |                                                |                                       |
| Maternal age                                             | 24.6(3.6)                                            | 24.1(4.5)                                            | 24.5(4.6)                                | 24.3(4.4)                                      | 0.81                                  |
| Maternal education                                       |                                                      |                                                      |                                          |                                                | <0.001                                |
| < 3 years                                                | 5(14.3)                                              | 10(10.1)                                             | 27(5.1)                                  | 19(2.6)                                        |                                       |
| Primary                                                  | 18(51.4)                                             | 31(31.3)                                             | 151(28.6)                                | 141(19.5)                                      |                                       |
| Secondary                                                | 11(31.4)                                             | 49(49.5)                                             | 303(57.4)                                | 435(60.2)                                      |                                       |
| High school+                                             | 1(2.9)                                               | 9(9.1)                                               | 47(8.9)                                  | 12(17.7)                                       |                                       |
| Maternal occupation                                      |                                                      |                                                      |                                          |                                                | <0.001                                |
| Farmer                                                   | 34(97.1)                                             | 91(91.9)                                             | 471(89.4)                                | 576(79.9)                                      |                                       |
| Others                                                   | 1(2.9)                                               | 8(8.1)                                               | 56(10.6)                                 | 145(20.1)                                      |                                       |
| Paternal age (years)                                     | 28.1(3.8)                                            | 27.3(4.2)                                            | 27.9(4.4)                                | 27.6(4.1)                                      | 0.38                                  |
| Paternal education                                       |                                                      |                                                      |                                          |                                                | <0.001                                |
| < 3 years                                                | 1(2.9)                                               | 1(1.0)                                               | 8(1.5)                                   | 2(0.3)                                         |                                       |
| Primary                                                  | 5(14.3)                                              | 14(14.1)                                             | 63(11.9)                                 | 57(7.9)                                        |                                       |
| Secondary                                                | 22(62.9)                                             | 64(64.7)                                             | 366(69.2)                                | 462(64.3)                                      |                                       |
| High school+                                             | 7(20.0)                                              | 20(20.2)                                             | 92(17.4)                                 | 198(27.5)                                      |                                       |
| Paternal occupation                                      |                                                      |                                                      |                                          |                                                | <0.001                                |

| Items                                   | Mean (SD)/ n (%)                                     |                                                      |                                          |                                                | P values for differences among groups |
|-----------------------------------------|------------------------------------------------------|------------------------------------------------------|------------------------------------------|------------------------------------------------|---------------------------------------|
|                                         | Subgroup 1: Start below average-then decrease (N=35) | Subgroup 2: Start below average-then increase (N=99) | Subgroup 3: Consistently average (N=530) | Subgroup 4: Consistently above average (N=724) |                                       |
| Farmer                                  | 28(80.0)                                             | 85(85.9)                                             | 430(81.1)                                | 511(70.8)                                      |                                       |
| Others                                  | 7(20.0)                                              | 14(14.1)                                             | 100(18.9)                                | 211(29.2)                                      |                                       |
| Household wealth                        |                                                      |                                                      |                                          |                                                | 0.001                                 |
| Low                                     | 11(31.4)                                             | 33(33.3)                                             | 131(24.7)                                | 149(20.6)                                      |                                       |
| Medium                                  | 12(34.3)                                             | 39(39.4)                                             | 235(44.3)                                | 276(38.1)                                      |                                       |
| High                                    | 12(34.3)                                             | 27(27.3)                                             | 164(30.9)                                | 299(41.3)                                      |                                       |
| Pregnancy Parity at enrollment          |                                                      |                                                      |                                          |                                                | 0.22                                  |
| 0                                       | 22(62.9)                                             | 69(69.7)                                             | 344(64.9)                                | 508(70.2)                                      |                                       |
| ≥1                                      | 13(37.1)                                             | 30(30.3)                                             | 186(35.1)                                | 216(29.8)                                      |                                       |
| MUAC (cm)                               | 22.6(1.4)                                            | 23.3(1.9)                                            | 23.2(1.8)                                | 23.2(1.8)                                      | 0.26                                  |
| <21.5                                   | 8(22.3)                                              | 15(15.2)                                             | 86(16.4)                                 | 110(15.3)                                      | 0.67                                  |
| ≥21.5                                   | 27(77.1)                                             | 84(84.9)                                             | 440(83.7)                                | 608(84.7)                                      |                                       |
| Randomized prenatal regimen             |                                                      |                                                      |                                          |                                                | 0.11                                  |
| Folic acid                              | 18(51.1)                                             | 33(33.3)                                             | 188(35.5)                                | 257(35.5)                                      |                                       |
| Iron/folic acid                         | 11(31.4)                                             | 38(38.4)                                             | 192(36.2)                                | 226(31.2)                                      |                                       |
| Multiple micronutrients                 | 6(17.1)                                              | 28(28.3)                                             | 150(28.3)                                | 241(33.3)                                      |                                       |
| Randomized prenatal regimen by duration |                                                      |                                                      |                                          |                                                | 0.02                                  |
| Folic acid or folic acid/iron <180 days | 25(71.4)                                             | 53(53.5)                                             | 289(54.5)                                | 369(51.0)                                      |                                       |

| Items                                                    | Mean (SD)/ n (%)                                     |                                                      |                                          |                                                | P values for differences among groups |
|----------------------------------------------------------|------------------------------------------------------|------------------------------------------------------|------------------------------------------|------------------------------------------------|---------------------------------------|
|                                                          | Subgroup 1: Start below average-then decrease (N=35) | Subgroup 2: Start below average-then increase (N=99) | Subgroup 3: Consistently average (N=530) | Subgroup 4: Consistently above average (N=724) |                                       |
| folic acid/iron ≥180 days                                | 4(11.4)                                              | 18(18.2)                                             | 91(17.2)                                 | 114(15.8)                                      |                                       |
| Multiple micronutrient <180 days                         | 5(14.3)                                              | 21(21.1)                                             | 87(16.4)                                 | 116(16.0)                                      |                                       |
| Multiple micronutrient ≥180 days                         | 1(2.9)                                               | 7(7.1)                                               | 63(11.9)                                 | 125(17.3)                                      |                                       |
| Birth outcomes                                           |                                                      |                                                      |                                          |                                                |                                       |
| Child sex                                                |                                                      |                                                      |                                          |                                                |                                       |
| Male                                                     | 27(77.1)                                             | 65(65.7)                                             | 338(63.8)                                | 415(57.3)                                      | 0.01                                  |
| Female                                                   | 8(22.9)                                              | 34(34.3)                                             | 192(36.2)                                | 309(42.7)                                      |                                       |
| Birth weight                                             | 2915(464)                                            | 3107(383)                                            | 3176(430)                                | 3216(389)                                      | <0.001                                |
| Preterm (<37 gestation weeks)                            | 3(8.6)                                               | 7(7.1)                                               | 141(2.6)                                 | 26(3.6)                                        | 0.06                                  |
| Small for gestational age (<10 <sup>th</sup> percentile) | 9(26.5)                                              | 13(14.3)                                             | 75(14.6)                                 | 68(9.7)                                        | 0.004                                 |
| Low birth weight (<2500g)                                | 6(17.7)                                              | 5(5.3)                                               | 24(4.6)                                  | 15(2.1)                                        | <0.001                                |

Abbreviation: MUAC, mid-upper arm circumference; SD, standard deviation.

<sup>a</sup>Socioeconomic factors were assessed at time of enrollment in original trial.

**Supplementary Table S4 Predictors of cognitive developmental trajectories identified in early childhood from a Chinese birth cohort study<sup>a</sup>**

| Factors                                                  | Start below average-then decrease vs. Start below average-then increase |          | Consistently average vs. Consistently above average |          |
|----------------------------------------------------------|-------------------------------------------------------------------------|----------|-----------------------------------------------------|----------|
|                                                          | RR (95% CI)                                                             | P values | RR (95% CI)                                         | P values |
| Maternal education per grade increase <sup>b</sup>       | 0.57(0.40, 0.83)                                                        | 0.003    | 0.87(0.78, 0.97)                                    | 0.01     |
| Maternal occupation-non-farmer                           | 0.41(0.06, 2.99)                                                        | 0.38     | 0.79(0.56, 1.12)                                    | 0.19     |
| Paternal education per grade increase <sup>b</sup>       | 1.09(0.74, 1.61)                                                        | 0.66     | 0.91(0.80, 1.03)                                    | 0.15     |
| Paternal occupation-non-farmer                           | 1.94(1.02, 3.70)                                                        | 0.04     | 0.96(0.76, 1.21)                                    | 0.74     |
| Household wealth per tertiles increase <sup>b</sup>      | 1.28(0.87, 1.89)                                                        | 0.22     | 0.96(0.88, 1.06)                                    | 0.44     |
| Randomized prenatal regimen by supplementing durations   |                                                                         |          |                                                     |          |
| Folic acid or folic acid plus iron <180 days             | 1.00<br>(Reference)                                                     |          | 1.00 (Reference)                                    |          |
| folic acid plus iron ≥180 days                           | 0.65(0.23, 1.82)                                                        | 0.41     | 1.01(0.85, 1.19)                                    | 0.92     |
| Multiple micronutrient <180 days                         | 0.69(0.31, 1.55)                                                        | 0.37     | 0.97(0.80, 1.18)                                    | 0.76     |
| Multiple micronutrient ≥180 days                         | 0.53(0.07, 3.82)                                                        | 0.53     | 0.76(0.61, 0.95)                                    | 0.02     |
| Child sex-Female                                         | 0.6(0.35, 1.34)                                                         | 0.27     | 0.89(0.77, 1.01)                                    | 0.07     |
| Preterm (<37 gestation weeks)                            | 1.23(0.44, 3.41)                                                        | 0.69     | 0.82(0.52, 1.30)                                    | 0.40     |
| Small for gestational age (<10 <sup>th</sup> percentile) | 1.74(0.98, 3.10)                                                        | 0.06     | 1.27(1.08, 1.49)                                    | 0.003    |
| Low birth weight (<2500g) <sup>c</sup>                   | 2.19(1.17, 4.11)                                                        | 0.01     | 1.42(1.08, 1.85)                                    | 0.01     |

<sup>a</sup>The trajectories were characterized as “Subgroup 1: Start below average-then decrease”, “Subgroup 2: Start below average-then increase”, “Subgroup 3: Consistently average”, and “Subgroup 4:



Consistently above average", respectively. Variables were included for their p values in the one-way analysis of variance or Chi-Square tests (table 3) less than 0.10 in the generalized estimating equations models with log-link, assuming Poisson distribution. And, the analyses were performed between subgroup 1 and 2, and between subgroup 3 and 4, with Subgroup 2 and 4 as reference subgroup, respectively.

<sup>b</sup>Maternal and paternal education were categorized as < 3 years, Primary, Secondary and High school+, respectively. Household wealth was categorized as low, medium and high, respectively. All the variables were then treated as continuous variables in the regression analyses.

<sup>c</sup>The results for low birth weight were adjusted for the variables in the main model but excluding preterm and small for gestational age.

**Supplementary Table S5 Associations of identified cognitive development trajectories in the first two years of life with cognitive outcomes in middle childhood and early adolescence: using inverse probability weighting to account for missing outcome data**

|                                                 |           | FSIQ at middle childhood<br>N=669 | FSIQ at early adolescence<br>N=735 |
|-------------------------------------------------|-----------|-----------------------------------|------------------------------------|
| Subgroup 1: Start below average-then decrease   | N         | 21                                | 15                                 |
|                                                 | Mean (SD) | 76.8(12.8)                        | 88.0(15.0)                         |
| Subgroup 2: Start below average-then increase   | N         | 36                                | 43                                 |
|                                                 | Mean (SD) | 91.3(12.9)                        | 97.0(12.0)                         |
| Subgroup 3: Consistently average                | N         | 256                               | 294                                |
|                                                 | Mean (SD) | 87.0(11.4)                        | 96.0(12.0)                         |
| Subgroup 4: Consistently above average          | N         | 356                               | 383                                |
|                                                 | Mean (SD) | 91.9(12.7)                        | 100.0(12.0)                        |
| -----                                           |           |                                   |                                    |
| Unadjusted mean differences (95% CI)            |           |                                   |                                    |
| Subgroup 1 vs Subgroup 4 as reference           |           | -15.20(-20.46, -9.94)             | -12.09(-18.07, -6.10)              |
| Subgroup 2 vs Subgroup 4 as reference           |           | -0.70(-4.62, 3.23)                | -3.95(-6.15, -1.76)                |
| Subgroup 3 vs Subgroup 4 as reference           |           | -5.01(-6.83, -3.19)               | -4.74(-6.69, -2.78)                |
| Subgroup 2 vs Subgroup 3 as reference           |           | 4.31(0.16, 8.46)                  | 0.78(-2.30, 3.87)                  |
| Subgroup 1 vs Subgroup 2 as reference           |           | -14.50(-20.41, -8.59)             | -8.13(-14.55, -1.71)               |
| -----                                           |           |                                   |                                    |
| Adjusted mean differences (95% CI) <sup>a</sup> |           |                                   |                                    |
| Subgroup 1 vs Subgroup 4 as reference           |           | -10.22(-14.44, -6.00)             | -8.13(-14.62, -1.64)               |
| Subgroup 2 vs Subgroup 4 as reference           |           | 1.72(-3.02, 6.46)                 | -2.60(-4.89, -0.31)                |
| Subgroup 3 vs Subgroup 4 as reference           |           | -2.93(-4.32, -1.53)               | -2.54(-4.44, -0.65)                |
| Subgroup 2 vs Subgroup 3 as reference           |           | 3.57(-1.23, 8.37)                 | 0.62(-2.62, 3.86)                  |
| Subgroup 1 vs Subgroup 2 as reference           |           | -11.46(-19.71, -3.21)             | -6.85(-13.35, -0.35)               |

<sup>a</sup>Adjusted for assessors and potential confounding factors including parental age, job and education at pregnancy enrollment, household wealth at pregnancy enrollment, maternal MUAC at pregnancy enrollment, maternal parity, randomized regimen, birth outcome (SGA), and sex in general estimating equation linear models.

Abbreviations: CI, confidence interval; FSIQ, full-scale intelligence quotient derived from WISC-IV, Wechsler Intelligence Scale for Children-Fourth Edition; SD, standard deviation; SGA, small for gestational age; MUAC, mid upper arm circumference.

**Supplementary Table S6 Associations of identified cognitive development trajectories in the first two years of life with WISC-IV components (VCI, WMI, PRI, PSI) at middle childhood**

|                                                 |               | WISC-IV at middle childhood (N=669) |                       |                       |                       |
|-------------------------------------------------|---------------|-------------------------------------|-----------------------|-----------------------|-----------------------|
|                                                 |               | VCI                                 | WMI                   | PRI                   | PSI                   |
| Subgroup 1: Start below average-then decrease   | N             | 21                                  | 21                    | 21                    | 21                    |
|                                                 | Mean (SD)     | 75.8(11.2)                          | 79.7(92.6)            | 84.6(15.0)            | 82.3(14.5)            |
| Subgroup 2: Start below average-then increase   | N             | 36                                  | 36                    | 36                    | 36                    |
|                                                 | Mean (SD)     | 90.9(16.0)                          | 92.6(10.6)            | 95.1(15.0)            | 93.6(11.9)            |
| Subgroup 3: Consistently average                | N             | 256                                 | 256                   | 256                   | 256                   |
|                                                 | Mean (SD)     | 85.1(14.8)                          | 89.3(10.5)            | 91.5(12.8)            | 93.5(11.6)            |
| Subgroup 4: Consistently above average          | N             | 356                                 | 356                   | 356                   | 356                   |
|                                                 | Mean (SD)     | 89.4(15.6)                          | 93.2(12.6)            | 95.5(12.9)            | 97.6(13.1)            |
| Unadjusted mean differences (95% CI)            | 1 vs 4 (ref.) | -13.51(-17.17, -9.89)               | -13.46(-20.08, -6.84) | -10.90(-16.22, -5.59) | -15.27(-21.43, -9.11) |
|                                                 | 2 vs 4 (ref.) | 1.63(-3.41, 6.67)                   | -0.57(-4.05, 2.91)    | -0.44(-6.08, 5.20)    | -3.95(-6.01, -1.89)   |
|                                                 | 3 vs 4 (ref.) | -4.25(-6.51, -2.00)                 | -3.93(-5.52, -2.33)   | -4.04(-5.79, -2.29)   | -4.04(-5.94, -2.14)   |
|                                                 | 2 vs 3 (ref.) | 5.88(0.88, 10.89)                   | 3.36(-0.42, 7.15)     | 3.60(-1.87, 9.07)     | 0.10(-2.57, 2.76)     |
|                                                 | 1 vs 2 (ref.) | -15.13(-20.35, -9.92)               | -12.90(-19.54, -6.26) | -10.46(-18.13, -2.80) | -11.33(-17.76, -4.89) |
| Adjusted mean differences (95% CI) <sup>a</sup> | 1 vs 4 (ref.) | -9.16(-11.46, -6.85)                | -9.22(-14.38, -4.06)  | -8.01(-13.53, -2.50)  | -10.88(-16.03, -5.73) |
|                                                 | 2 vs 4 (ref.) | 3.60(-0.61, 7.80)                   | 2.16(-1.79, 6.11)     | 0.21(-6.26, 6.68)     | -1.37(-4.35, 1.61)    |
|                                                 | 3 vs 4 (ref.) | -2.20(0.38, 4.02)                   | -2.41(-3.55, -1.26)   | -2.74(-4.74, -0.74)   | -2.34 (-3.91, -0.77)  |
|                                                 | 2 vs 3 (ref.) | 4.52(-0.15, 9.19)                   | 3.43(-0.32, 7.18)     | 3.10(-3.12, 9.31)     | -0.17(-3.68, 3.34)    |
|                                                 | 1 vs 2 (ref.) | -10.77(-17.33, -4.22)               | -10.99(-16.34, -5.63) | -10.04(-22.12, 2.03)  | -7.70(-15.87, 0.47)   |

<sup>a</sup>Adjusted for assessors and potential confounding factors including parental age, job and education at pregnancy enrollment, household wealth at pregnancy enrollment, maternal middle-upper arm circumferences at pregnancy enrollment, parity, maternal pregnancy micronutrient supplements, birth outcome (small for gestational age), and sex in general estimating equation linear models. Abbreviations: CI, confidence interval; FSIQ, full-scale intelligence quotient derived from WISC-IV, Wechsler Intelligence Scale for Children-Fourth Edition; SD, standard deviation.

**Supplementary Table S7 Associations of identified cognitive development trajectories in the first two years of life with WISC-IV components (VCI, WMI, PRI, PSI) at early adolescence**

|                                                 |               | WISC-IV at early adolescence (n=735) |                      |                     |                       |
|-------------------------------------------------|---------------|--------------------------------------|----------------------|---------------------|-----------------------|
|                                                 |               | VCI                                  | WMI                  | PRI                 | PSI                   |
| Subgroup 1: Start below average-then decrease   | N             | 15                                   | 15                   | 15                  | 15                    |
|                                                 | Mean (SD)     | 92.0(15.0)                           | 88.0(11.0)           | 90.0(21.0)          | 91.0(12.0)            |
| Subgroup 2: Start below average-then increase   | N             | 43                                   | 43                   | 43                  | 43                    |
|                                                 | Mean (SD)     | 103.0(18.0)                          | 92.0(9.0)            | 96.0(12.0)          | 97.0(14.0)            |
| Subgroup 3: Consistently average                | N             | 294                                  | 294                  | 294                 | 294                   |
|                                                 | Mean (SD)     | 101.0(16.0)                          | 93.0(12.0)           | 94.0(12.0)          | 98.0(13.0)            |
| Subgroup 4: Consistently above average          | N             | 383                                  | 383                  | 383                 | 383                   |
|                                                 | Mean (SD)     | 105.0(15.0)                          | 96.0(11.0)           | 98.0(13.0)          | 102.0(13.0)           |
| Unadjusted mean differences (95% CI)            | 1 vs 4 (ref.) | -12.97(-18.71, -7.22)                | -7.67(-12.40, -2.93) | -8.03(-17.94, 1.87) | -11.54(-16.63, -6.45) |
|                                                 | 2 vs 4 (ref.) | -1.63(-6.20, 2.95)                   | -4.33(-6.70, -1.96)  | -1.68(-4.86, 1.50)  | -5.80(-9.46, -2.14)   |
|                                                 | 3 vs 4 (ref.) | -3.85(-6.12, -1.58)                  | -2.60(-4.40, -0.80)  | -3.50(-5.33, -1.68) | -4.61(-6.24, -2.97)   |
|                                                 | 2 vs 3 (ref.) | 2.22(-2.93, 7.38)                    | -1.73(-4.70, 1.25)   | 1.82(-1.72, 5.36)   | -1.19(-4.97, 2.58)    |
|                                                 | 1 vs 2 (ref.) | -11.34(-18.44, -4.24)                | -3.34(-8.01, 1.34)   | -6.35(-16.92, 4.21) | -5.74(-12.97, 1.49)   |
| Adjusted mean differences (95% CI) <sup>a</sup> | 1 vs 4 (ref.) | -9.67(-15.17, -4.16)                 | -5.29(-10.36, -0.22) | -5.93(-15.79, 3.93) | -7.21(-13.58, -0.84)  |
|                                                 | 2 vs 4 (ref.) | -1.41(-6.02, 3.19)                   | -3.19(-5.72, -0.66)  | -0.64(-3.53, 2.25)  | -3.76(-6.33, -1.19)   |
|                                                 | 3 vs 4 (ref.) | -1.40(-3.62, 0.81)                   | -1.27(-2.95, 0.40)   | -2.12(-4.00, -0.24) | -3.20(-4.75, -1.64)   |
|                                                 | 2 vs 3 (ref.) | 0.41(-4.97, 5.79)                    | -1.44(-4.67, 1.78)   | 2.38(-0.70, 5.44)   | -0.29(-3.22, 2.65)    |
|                                                 | 1 vs 2 (ref.) | -8.78(-17.93, 0.37)                  | -1.02(-5.67, 3.62)   | -8.00(-18.66, 2.66) | -5.41(-9.57, -1.26)   |

<sup>a</sup>Adjusted for assessors and potential confounding factors including parental age, job and education at pregnancy enrollment, household wealth at pregnancy enrollment, maternal middle-upper arm circumferences at pregnancy enrollment, parity, maternal pregnancy micronutrient supplements, birth outcome (small for gestational age), and sex in general estimating equation linear models. Abbreviations: CI, confidence interval; FSIQ, full-scale intelligence quotient derived from WISC-IV, Wechsler Intelligence Scale for Children-Fourth Edition; SD, standard deviation.

**Supplementary Table S8 Tertiles of mental development score at the 12 and 24 months and cognitive outcomes at middle childhood and early adolescence**

| Mental development | FSIQ at middle childhood |            |                                                 |                                     | FSIQ at early adolescence |             |                                                 |                                     |
|--------------------|--------------------------|------------|-------------------------------------------------|-------------------------------------|---------------------------|-------------|-------------------------------------------------|-------------------------------------|
|                    | N                        | Mean (SD)  | Adjusted mean differences (95% CI) <sup>a</sup> | Correlation coefficients (p values) | N                         | Mean (SD)   | Adjusted mean differences (95% CI) <sup>a</sup> | Correlation coefficients (p values) |
| 12 months          |                          |            |                                                 | 0.182 (<0.001)                      |                           |             |                                                 | 0.175(<0.001)                       |
| Q1 (lowest)        | 205                      | 86.6(12.4) | Reference                                       |                                     | 219                       | 96.0(13.0)  | Reference                                       |                                     |
| Q2                 | 206                      | 90.3(12.3) | 2.74(1.91, 3.57)                                |                                     | 221                       | 99.0(13.0)  | 1.28(-0.96, 3.51)                               |                                     |
| Q3 (highest)       | 173                      | 92.0(12.0) | 3.98(2.05, 5.92)                                |                                     | 198                       | 100.0(11.0) | 2.57(0.31, 4.82)                                |                                     |
| 24 months          |                          |            |                                                 | 0.329 (<0.001)                      |                           |             |                                                 | 0.295(<0.001)                       |
| Q1 (lowest)        | 203                      | 85.7(11.1) | Reference                                       |                                     | 218                       | 95.0(12.0)  | Reference                                       |                                     |
| Q2                 | 199                      | 89.8(12.3) | 3.51(1.45, 5.56)                                |                                     | 210                       | 98.0(13.0)  | 2.36(-0.51, 5.23)                               |                                     |
| Q3 (highest)       | 188                      | 94.1(12.4) | 6.21(4.08, 8.34)                                |                                     | 203                       | 103(11.0)   | 4.67(2.01, 7.33)                                |                                     |

<sup>a</sup>Adjusted for assessors and potential confounding factors including parental age, job and education at pregnancy enrollment, household wealth at pregnancy enrollment, maternal MUAC at pregnancy enrollment, parity, randomized maternal pregnancy micronutrient supplements, birth outcome (SGA), and sex in general estimating equation linear models.

Abbreviations: CI, confidence interval; FSIQ, full-scale intelligence quotient derived from WISC-IV, Wechsler Intelligence Scale for Children-Fourth Edition; SD, standard deviation; SGA, small for gestational age; MUAC, mid upper arm circumference.



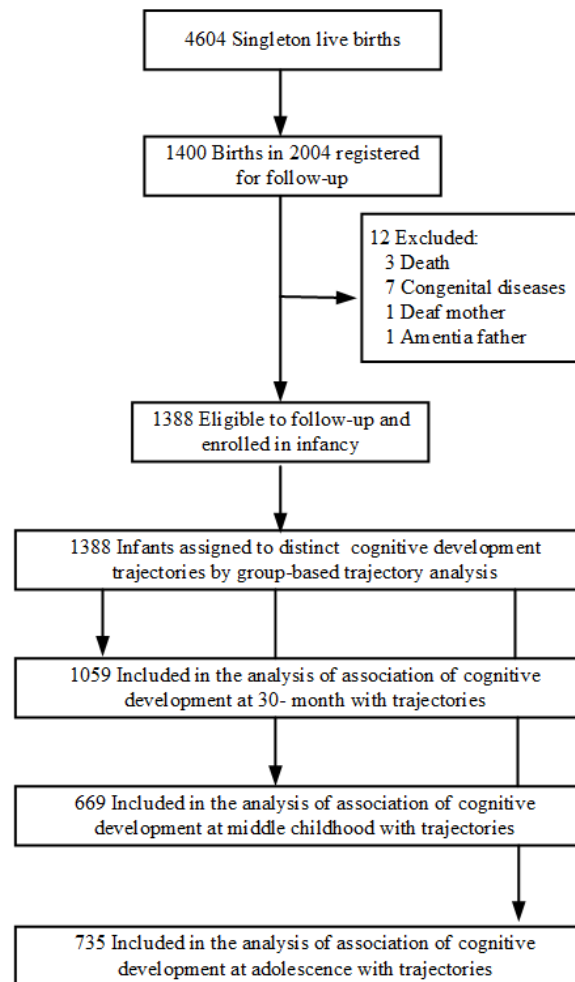

**Supplementary Fig. S1 Flow chart of study participants**
